# Supplementary material
Source: PubMed Central journal article supplement (PMC7344835)
Supplement: jamapsychiatry-e201767-s003.pdf [file jamapsychiatry-e201767-s003.pdf]

## **Data Sharing Statement**

### **Data**

**Data available:** No

### **Additional Information**

**Explanation for why data not available:** data may be shared after the primary and secondary papers have been published
